# Supplementary material
Source: publisher figshare collection journal article supplement (https://acs.figshare.com/ndownloader/files/21814887)
Supplement: Supplementary file [file 21814887]

# Nucleation of poly(lactide) partially wet droplets in ternary blends with poly(butylene succinate) and poly( $\epsilon$ -caprolactone)

Seif Eddine Fenni , Jun Wang , Nacerddine Haddaoui , Basil D. Favis , Alejandro J. Müller and Dario Cavallo

## SUPPLEMENTARY INFORMATION

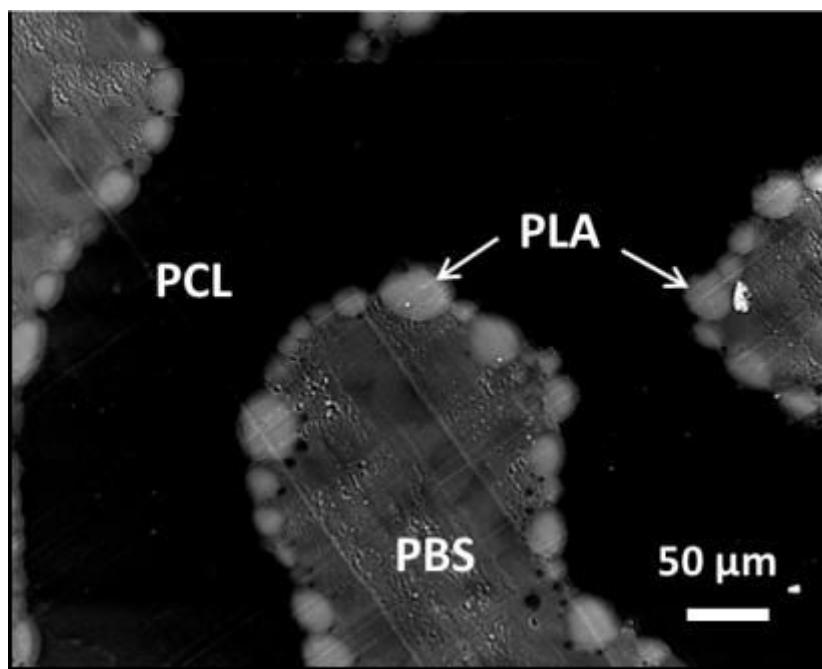

**Figure S1.** SEM micrographs of PCL/PLA/PBS ternary blend with weight composition of 45/10/45 after annealing for 20 min at 185°C.

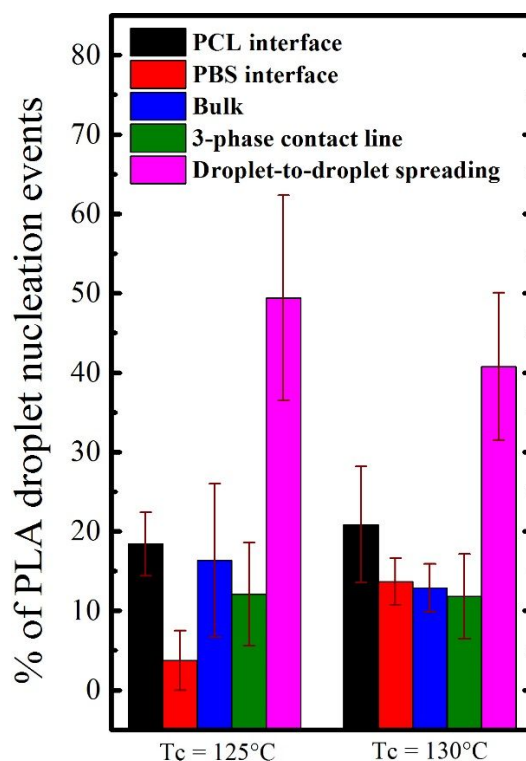

**Figure S2.** Percentage of PLA droplets that nucleate according to the different modalities highlighted, at two different crystallization temperatures  $T_c$  (125°C and 130°C).

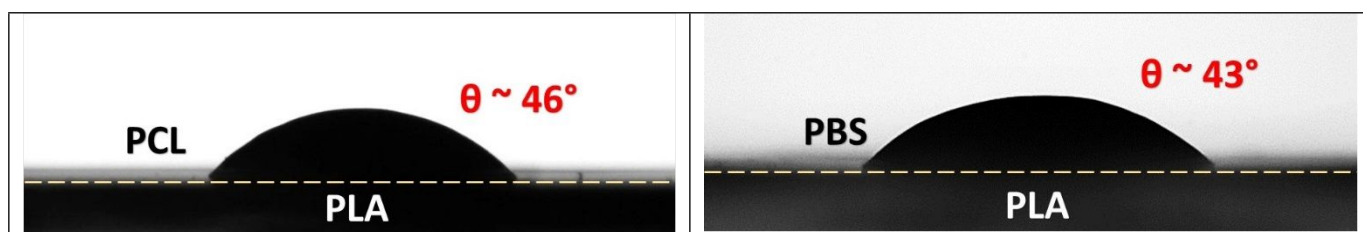

**Figure S3.** Selected photographs captured for contact angle analysis. PCL (left) and PBS (right) droplets on top of PLA film. The droplet/film interface is indicated with a dashed line.

### Web Enhanced Objects:

#### VIDEOS

- 1) Crystallization of partially wet PLA droplets in PCL/PLA/PBS ternary blend (Figure 1)
- 2) Example of mobility of partially wet PLA droplets at the PBS/PCL interface during PLA crystallization
- 3) Example of mobility of partially wet PLA droplets at the PBS/PCL interface during PLA crystallization
- 4) Crystallization of partially wet PLA droplets in PCL/PLA/PBS ternary blend (Figure 4)

5) Crystallization of partially wet PLA droplets in PCL/PLA/PBS ternary blend (Figure 5)
